# Supplementary material for: Fast material search of lithium ion conducting oxides using a recommender system
Source: Royal Society of Chemistry journal article supplement (doi:10.1039/d0ta02556a), 2020-01-01
Supplement: d0ta02556a1.pdf [file d0ta02556a1.pdf]

## Supporting Information

### Fast Material Search of Lithium Ion Conducting Oxides Using a Recommender System

*Kota Suzuki, Kosei Ohura, Atsuto Seko, Yudai Iwamizu, Guowei Zhao, Masaaki Hirayama, Isao Tanaka, and Ryoji Kanno\**

**Table S1.** Molar fraction of cations and nominal composition of Li-Ge-P of unknown CRCs in  $\text{Li}_2\text{O-GeO}_2\text{-P}_2\text{O}_5$  quasi-ternary system.

| Unknown CRC ID | Predicted rating | Li | Ge | P | Nominal composition                             |
|----------------|------------------|----|----|---|-------------------------------------------------|
| GP1            | 0.1715           | 3  | 2  | 1 | $\text{Li}_3\text{Ge}_2\text{PO}_8$             |
| GP2            | 0.0722           | 1  | 1  | 1 | $\text{LiGePO}_5$                               |
| GP3            | 0.0248           | 2  | 1  | 1 | $\text{Li}_4\text{Ge}_2\text{P}_2\text{O}_{11}$ |
| GP4            | 0.0167           | 1  | 2  | 1 | $\text{LiGe}_2\text{PO}_7$                      |
| GP5            | 0.0165           | 2  | 3  | 1 | $\text{Li}_4\text{Ge}_6\text{P}_2\text{O}_{19}$ |
| GP6            | 0.0103           | 3  | 1  | 2 | $\text{Li}_6\text{Ge}_2\text{P}_4\text{O}_{17}$ |

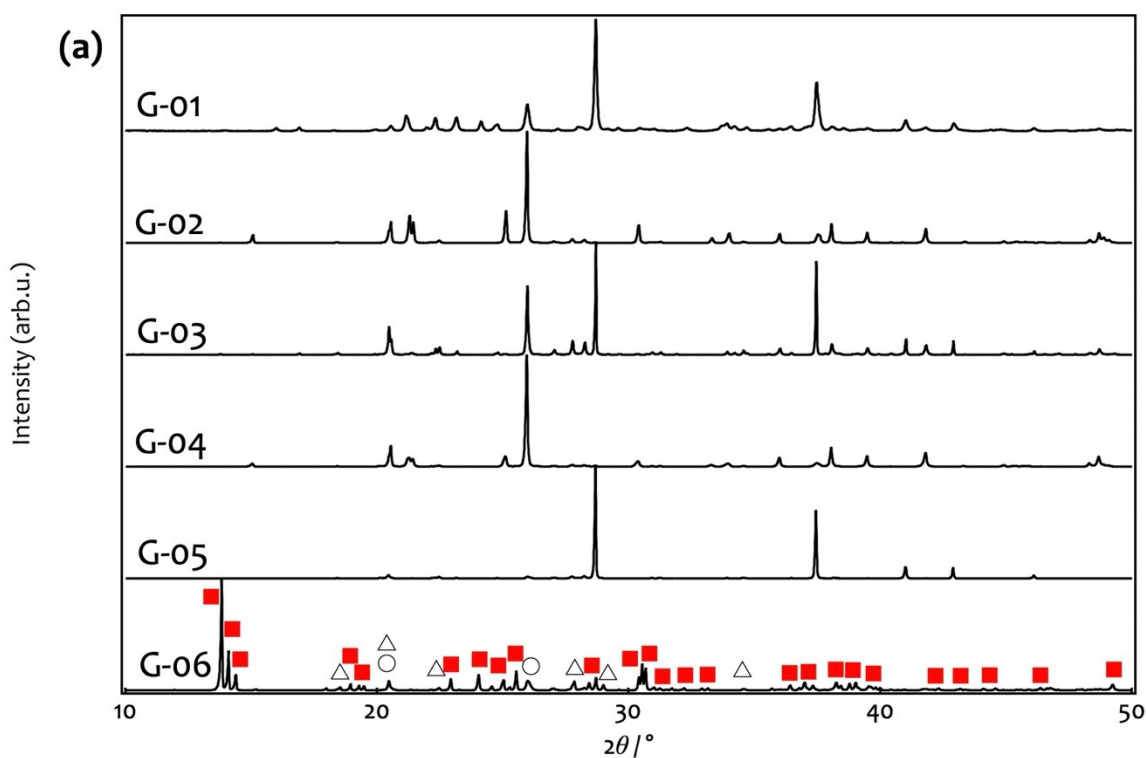

**Figure S1 (a).** XRD patterns of the obtained products (experimental ID from G-01 to G-06). The squares (■), triangles (Δ), and circles (○) indicate the diffraction peaks from unknown phase I,  $\text{Li}_4\text{P}_2\text{O}_7$ , and  $\text{GeO}_2$ , respectively.

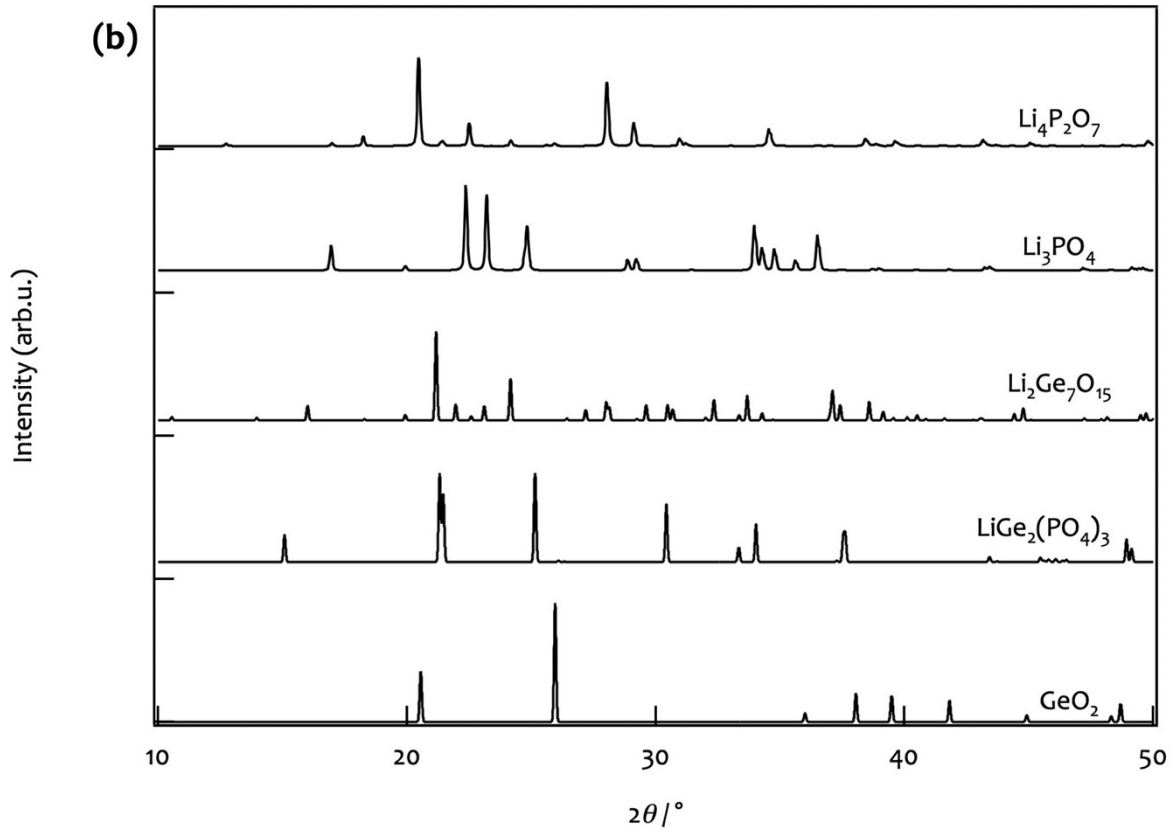

**Figure S1 (b).** XRD patterns of the detected known phases for material search in the  $\text{Li}_2\text{O}-\text{GeO}_2-\text{P}_2\text{O}_5$  quasi-ternary system.

**Table S2.** Summary of the searched materials in the  $\text{Li}_2\text{O}-\text{GeO}_2-\text{P}_2\text{O}_5$  quasi-ternary system.

| Experimental ID | Unknown CRC ID | Identified phases                                                                     |
|-----------------|----------------|---------------------------------------------------------------------------------------|
| G-01            | GP1            | $\text{Li}_2\text{Ge}_7\text{O}_{15}$<br>$\text{Li}_3\text{PO}_4$<br>$\text{GeO}_2$   |
| G-02            | GP2            | $\text{LiGe}_2(\text{PO}_4)_3$<br>$\text{Li}_4\text{P}_2\text{O}_7$<br>$\text{GeO}_2$ |
| G-03            | GP3            | $\text{Li}_3\text{PO}_4$<br>$\text{Li}_4\text{P}_2\text{O}_7$<br>$\text{GeO}_2$       |
| G-04            | GP4            | $\text{LiGe}_2(\text{PO}_4)_3$<br>$\text{Li}_4\text{P}_2\text{O}_7$<br>$\text{GeO}_2$ |
| G-05            | GP5            | $\text{Li}_3\text{PO}_4$<br>$\text{Li}_4\text{P}_2\text{O}_7$<br>$\text{GeO}_2$       |
| G-06            | GP6            | Unknown I<br>$\text{Li}_4\text{P}_2\text{O}_7$<br>$\text{GeO}_2$                      |

**Table S3.** Summary of the synthetic conditions for  $\text{Li}_6\text{Ge}_2\text{P}_4\text{O}_{17}$  (unknown CRC ID 6) in the  $\text{Li}_2\text{O}$ - $\text{GeO}_2$ - $\text{P}_2\text{O}_5$  quasi-ternary system.

| Experimental ID | Li excess (mol%) | Synthesis temperature $T / ^\circ\text{C}$ | Identified phases                                                                                  |
|-----------------|------------------|--------------------------------------------|----------------------------------------------------------------------------------------------------|
| G-06            | 5                | 900                                        | Unknown I<br>$\text{Li}_4\text{P}_2\text{O}_7$<br>$\text{GeO}_2$                                   |
| F-01            | 0                | 700                                        | Unknown I<br>$\text{LiGe}_2(\text{PO}_4)_3$<br>$\text{Li}_4\text{P}_2\text{O}_7$<br>$\text{GeO}_2$ |
| F-02            | 0                | 750                                        | Unknown I<br>$\text{LiGe}_2(\text{PO}_4)_3$<br>$\text{Li}_4\text{P}_2\text{O}_7$<br>$\text{GeO}_2$ |
| F-03            | 0                | 780                                        | Unknown I                                                                                          |
| F-04            | 0                | 800                                        | Unknown I                                                                                          |
| F-05            | 0                | 850                                        | $\text{Li}_4\text{P}_2\text{O}_7$<br>$\text{GeO}_2$                                                |
| F-06            | 0                | 900                                        | $\text{Li}_4\text{P}_2\text{O}_7$<br>$\text{GeO}_2$                                                |

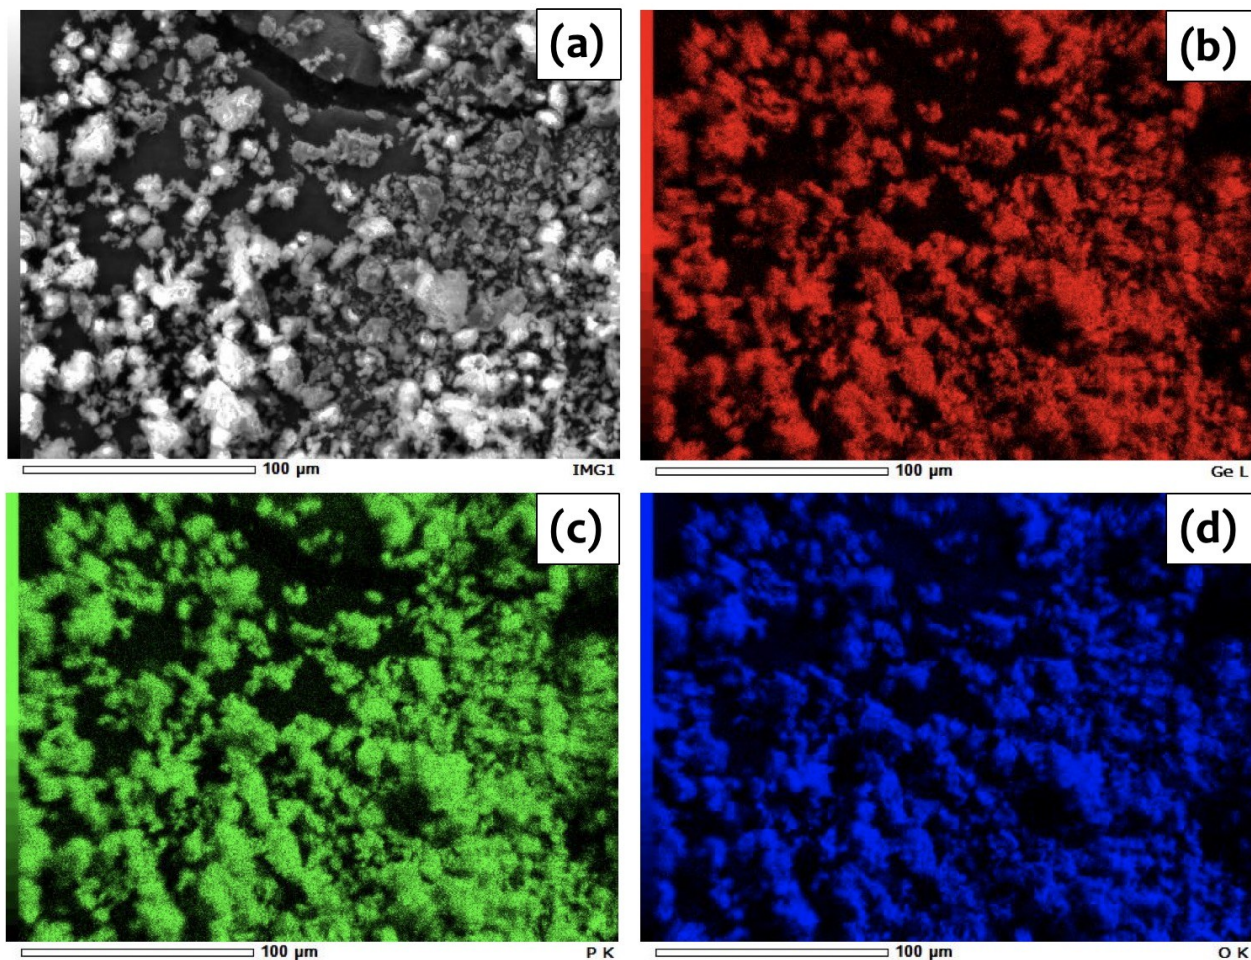

**Figure S2.** (a) SEM image of  $\text{Li}_6\text{Ge}_2\text{P}_4\text{O}_{17}$ . EDX mapping results of (b) Ge, (c) P, and (d) O for  $\text{Li}_6\text{Ge}_2\text{P}_4\text{O}_{17}$ .

**Table S4.** Molar fraction of cations and nominal composition of Li-Zn-Ge of unknown CRCs in the  $\text{Li}_2\text{O}$ - $\text{ZnO}$ - $\text{GeO}_2$  quasi-ternary system.

| Unknown CRC ID | Predicted rating | Li | Zn | Ge | Nominal composition                              |
|----------------|------------------|----|----|----|--------------------------------------------------|
| ZG1            | 0.1467           | 2  | 1  | 2  | $\text{Li}_2\text{ZnGe}_2\text{O}_6$             |
| ZG2            | 0.0914           | 1  | 1  | 1  | $\text{Li}_2\text{Zn}_2\text{Ge}_2\text{O}_7$    |
| ZG3            | 0.0156           | 4  | 1  | 3  | $\text{Li}_4\text{ZnGe}_3\text{O}_9$             |
| ZG4            | 0.0135           | 3  | 1  | 4  | $\text{Li}_6\text{Zn}_2\text{Ge}_8\text{O}_{21}$ |
| ZG5            | 0.0099           | 3  | 3  | 2  | $\text{Li}_6\text{Zn}_6\text{Ge}_4\text{O}_{17}$ |
| ZG6            | 0.0095           | 3  | 2  | 3  | $\text{Li}_6\text{Zn}_4\text{Ge}_6\text{O}_{19}$ |
| ZG7            | 0.0093           | 2  | 3  | 1  | $\text{Li}_2\text{Zn}_3\text{GeO}_6$             |
| ZG8            | 0.0092           | 2  | 3  | 2  | $\text{Li}_2\text{Zn}_3\text{Ge}_2\text{O}_8$    |
| ZG9            | 0.0086           | 4  | 1  | 2  | $\text{Li}_4\text{ZnGe}_2\text{O}_7$             |
| ZG10           | 0.0077           | 2  | 2  | 3  | $\text{Li}_2\text{Zn}_2\text{Ge}_3\text{O}_9$    |

**Table S5.** Summary of the searched materials in the Li<sub>2</sub>O-ZnO-GeO<sub>2</sub> quasi-ternary system.

| Experimental ID | Unknown CRC ID | Cooling method | Identified phases                                                                                                                                              |
|-----------------|----------------|----------------|----------------------------------------------------------------------------------------------------------------------------------------------------------------|
| Z-01            | ZG1            | Natural        | Li <sub>2</sub> ZnGeO <sub>4</sub><br>Li <sub>2</sub> ZnGe <sub>3</sub> O <sub>8</sub>                                                                         |
| Z-02            | ZG1            | Quench         | Li <sub>2</sub> ZnGeO <sub>4</sub><br>Li <sub>2</sub> ZnGe <sub>3</sub> O <sub>8</sub>                                                                         |
| Z-03            | ZG2            | Natural        | Li <sub>2</sub> ZnGeO <sub>4</sub><br>Li <sub>2</sub> ZnGe <sub>3</sub> O <sub>8</sub><br>Zn <sub>2</sub> GeO <sub>4</sub>                                     |
| Z-04            | ZG2            | Quench         | Li <sub>2</sub> ZnGeO <sub>4</sub><br>Li <sub>2</sub> ZnGe <sub>3</sub> O <sub>8</sub><br>Zn <sub>2</sub> GeO <sub>4</sub>                                     |
| Z-05            | ZG3            | Natural        | Li <sub>2</sub> ZnGeO <sub>4</sub><br>Li <sub>2</sub> ZnGe <sub>3</sub> O <sub>8</sub><br>Li <sub>2</sub> GeO <sub>3</sub>                                     |
| Z-06            | ZG4            | Natural        | Unknown II<br>Li <sub>2</sub> ZnGe <sub>3</sub> O <sub>8</sub><br>Li <sub>2</sub> GeO <sub>3</sub>                                                             |
| Z-07            | ZG4            | Quench         | Unknown II<br>Li <sub>2</sub> ZnGe <sub>3</sub> O <sub>8</sub><br>Li <sub>2</sub> GeO <sub>3</sub>                                                             |
| Z-08            | ZG5            | Natural        | Li <sub>2</sub> ZnGeO <sub>4</sub><br>Zn <sub>2</sub> GeO <sub>4</sub><br>ZnO                                                                                  |
| Z-09            | ZG5            | Quench         | Li <sub>2</sub> ZnGeO <sub>4</sub><br>Zn <sub>2</sub> GeO <sub>4</sub><br>ZnO                                                                                  |
| Z-10            | ZG6            | Natural        | Li <sub>2</sub> ZnGeO <sub>4</sub><br>Li <sub>2</sub> ZnGe <sub>3</sub> O <sub>8</sub><br>Zn <sub>2</sub> GeO <sub>4</sub>                                     |
| Z-11            | ZG6            | Quench         | Li <sub>2</sub> ZnGeO <sub>4</sub><br>Li <sub>2</sub> ZnGe <sub>3</sub> O <sub>8</sub><br>Zn <sub>2</sub> GeO <sub>4</sub>                                     |
| Z-12            | ZG7            | Natural        | Li <sub>2</sub> ZnGeO <sub>4</sub><br>ZnO                                                                                                                      |
| Z-13            | ZG7            | Quench         | Li <sub>2</sub> ZnGeO <sub>4</sub><br>ZnO                                                                                                                      |
| Z-14            | ZG8            | Natural        | Li <sub>2</sub> ZnGeO <sub>4</sub><br>Zn <sub>2</sub> GeO <sub>4</sub><br>ZnO                                                                                  |
| Z-15            | ZG8            | Quench         | Li <sub>2</sub> ZnGeO <sub>4</sub><br>Zn <sub>2</sub> GeO <sub>4</sub><br>ZnO                                                                                  |
| Z-16            | ZG9            | Natural        | LISICON<br>Li <sub>2</sub> ZnGeO <sub>4</sub><br>Li <sub>2</sub> GeO <sub>3</sub>                                                                              |
| Z-17            | ZG9            | Quench         | LISICON<br>Li <sub>2</sub> ZnGeO <sub>4</sub><br>Li <sub>2</sub> GeO <sub>3</sub>                                                                              |
| Z-18            | ZG10           | Natural        | Unknown III<br>Li <sub>2</sub> ZnGeO <sub>4</sub><br>Li <sub>2</sub> ZnGe <sub>3</sub> O <sub>8</sub><br>Zn <sub>2</sub> GeO <sub>4</sub><br>Li <sub>2</sub> O |

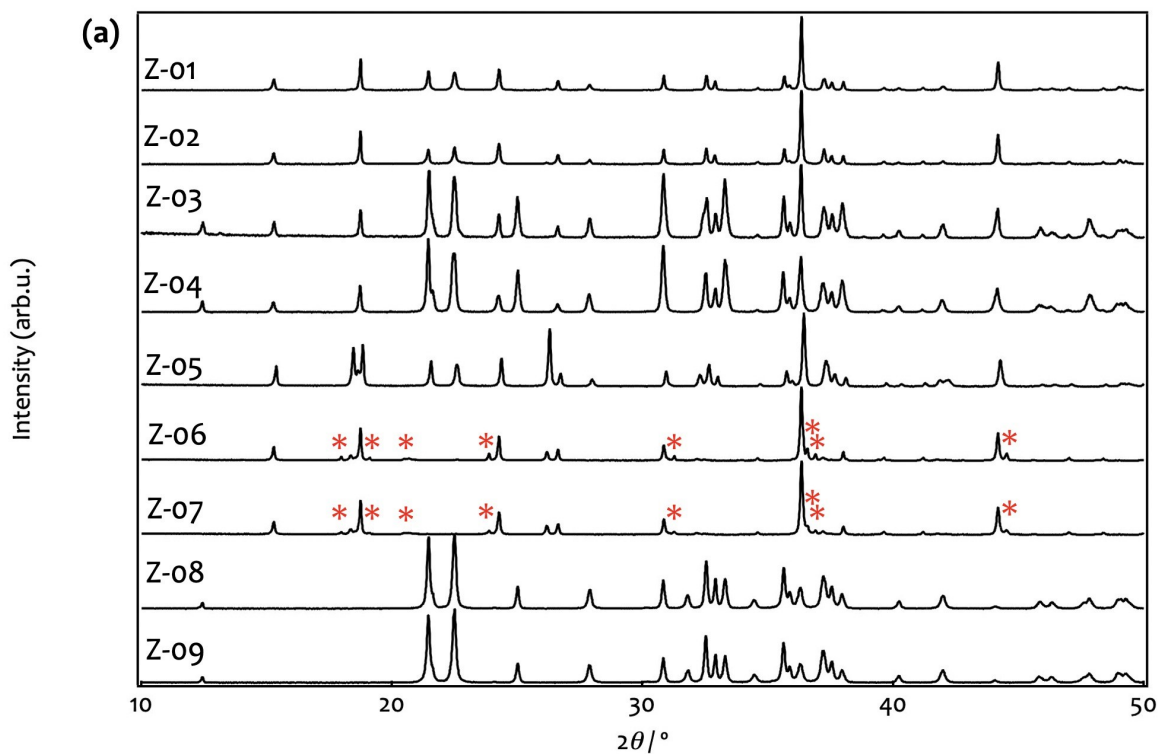

**Figure S3 (a).** XRD patterns of the obtained products with experimental IDs from Z-01 to Z-09. The asterisks (\*) indicate the diffraction peaks from unknown phase II.

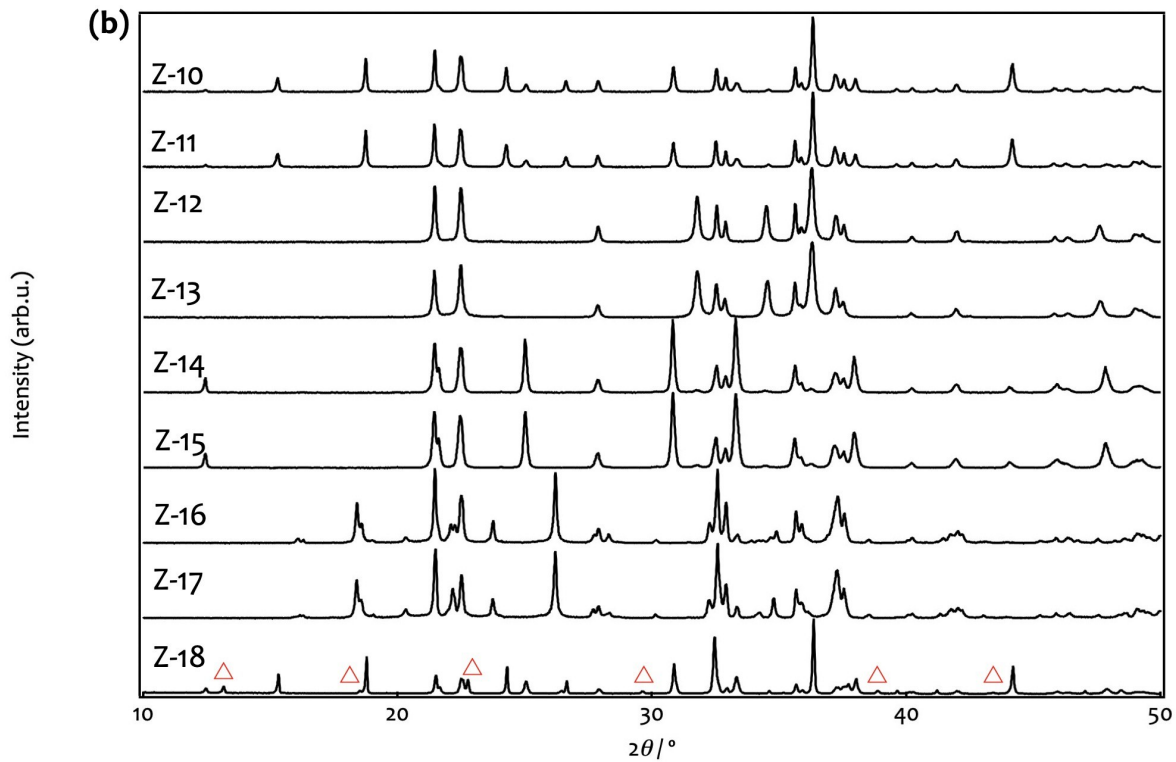

**Figure S3 (b).** XRD patterns of the obtained products with experimental IDs from Z-10 to Z-16. Triangles ( $\Delta$ ) indicate the diffraction peaks from unknown phase III.

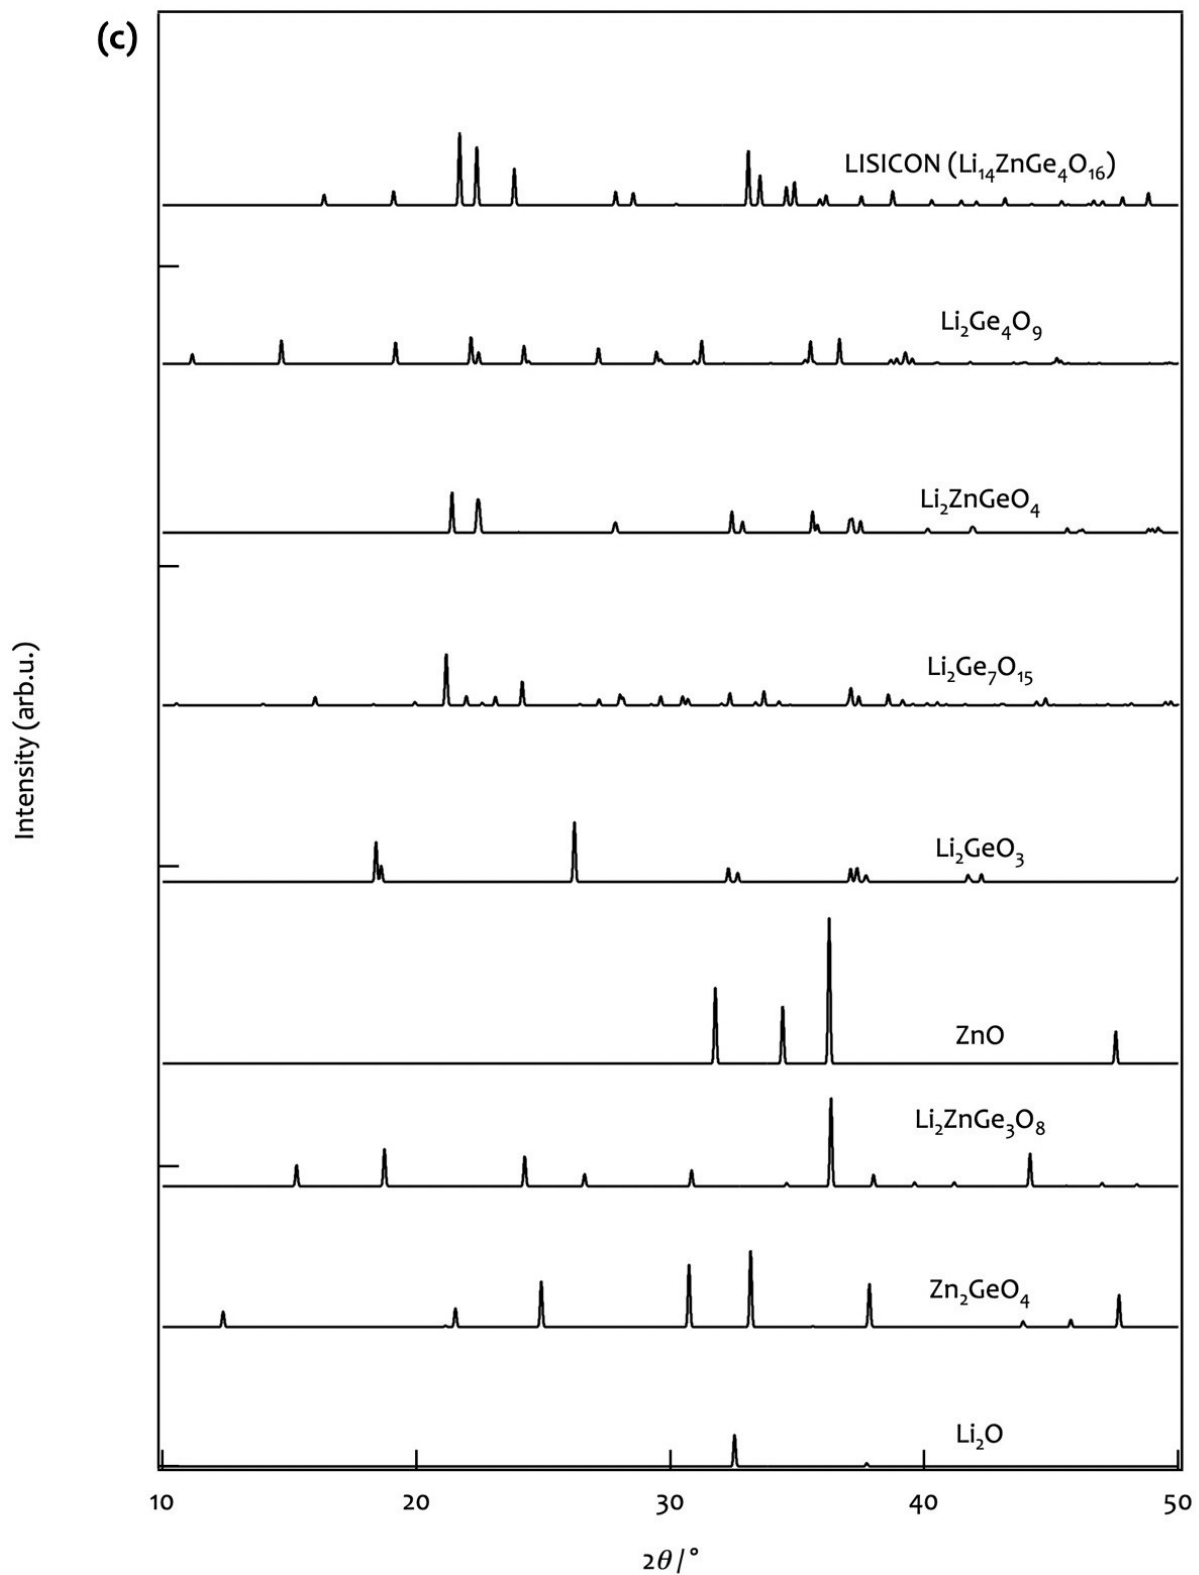

**Figure S3 (c).** XRD patterns of the detected known phases for material search in the Li<sub>2</sub>O-ZnO-GeO<sub>2</sub> quasi-ternary system.

**Table S6.** Summary of the searched materials in the Li<sub>2</sub>O-ZnO-GeO<sub>2</sub> quasi-ternary system with a composition around unknown CRC ID 4.

| Experimental ID            | Li   | Zn   | Ge   | Nominal composition                                                      | Identified phases                                                                                                                                   |
|----------------------------|------|------|------|--------------------------------------------------------------------------|-----------------------------------------------------------------------------------------------------------------------------------------------------|
| Z-06<br>(unknown CRC ID 4) | 3    | 1    | 4    | Li <sub>6</sub> Zn <sub>2</sub> Ge <sub>8</sub> O <sub>21</sub>          | Unknown II<br>Li <sub>2</sub> ZnGe <sub>3</sub> O <sub>8</sub><br>Li <sub>2</sub> GeO <sub>3</sub><br>Unknown II                                    |
| Y-01                       | 3    | 0.6  | 4.4  | Li <sub>3</sub> Zn <sub>0.6</sub> Ge <sub>4.4</sub> O <sub>10.9</sub>    | Li <sub>2</sub> GeO <sub>3</sub><br>Li <sub>2</sub> Ge <sub>4</sub> O <sub>9</sub><br>Li <sub>2</sub> Ge <sub>7</sub> O <sub>15</sub>               |
| Y-02                       | 3    | 0.65 | 4.35 | Li <sub>3</sub> Zn <sub>0.65</sub> Ge <sub>4.35</sub> O <sub>10.85</sub> | Unknown II<br>Unknown II                                                                                                                            |
| Y-03                       | 2.8  | 0.3  | 3.3  | Li <sub>2.8</sub> Zn <sub>0.3</sub> Ge <sub>3.3</sub> O <sub>8.3</sub>   | Li <sub>2</sub> GeO <sub>3</sub><br>Li <sub>2</sub> Ge <sub>4</sub> O <sub>9</sub><br>Li <sub>2</sub> Ge <sub>7</sub> O <sub>15</sub><br>Unknown II |
| Y-04                       | 5.2  | 0.7  | 6.7  | Li <sub>5.2</sub> Zn <sub>0.7</sub> Ge <sub>6.7</sub> O <sub>16.7</sub>  | Li <sub>2</sub> GeO <sub>3</sub><br>Li <sub>2</sub> Ge <sub>4</sub> O <sub>9</sub><br>Li <sub>2</sub> Ge <sub>7</sub> O <sub>15</sub><br>Unknown II |
| Y-05                       | 1.2  | 0.2  | 1.7  | Li <sub>1.2</sub> Zn <sub>0.2</sub> Ge <sub>1.7</sub> O <sub>4.2</sub>   | Li <sub>2</sub> GeO <sub>3</sub><br>Li <sub>2</sub> Ge <sub>4</sub> O <sub>9</sub><br>Li <sub>2</sub> Ge <sub>7</sub> O <sub>15</sub>               |
| Y-06                       | 2.67 | 0.33 | 4    | Li <sub>2.67</sub> Zn <sub>0.33</sub> Ge <sub>4</sub> O <sub>9.665</sub> | Unknown II<br>Li <sub>2</sub> ZnGe <sub>3</sub> O <sub>8</sub><br>Unknown II                                                                        |
| Y-07                       | 2.33 | 0.33 | 4    | Li <sub>2.33</sub> Zn <sub>0.33</sub> Ge <sub>4</sub> O <sub>9.495</sub> | Li <sub>2</sub> GeO <sub>3</sub><br>Li <sub>2</sub> Ge <sub>4</sub> O <sub>9</sub><br>Li <sub>2</sub> Ge <sub>7</sub> O <sub>15</sub>               |



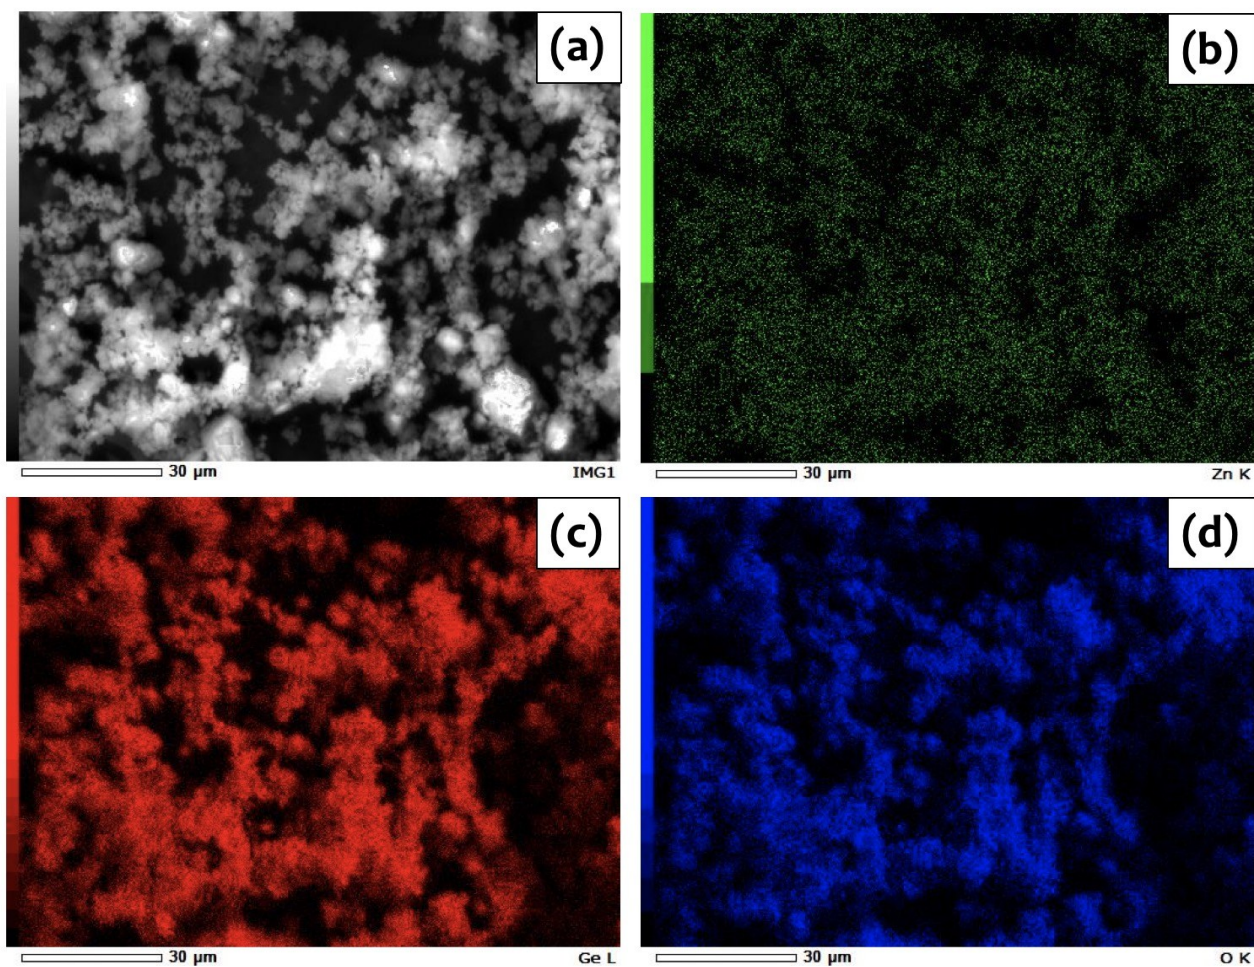

**Figure S4.** (a) SEM image of  $\text{Li}_3\text{Zn}_{0.65}\text{Ge}_{4.35}\text{O}_{10.85}$ . EDX mapping results of (b) Zn, (c) Ge, and (d) O for  $\text{Li}_3\text{Zn}_{0.65}\text{Ge}_{4.35}\text{O}_{10.85}$ .

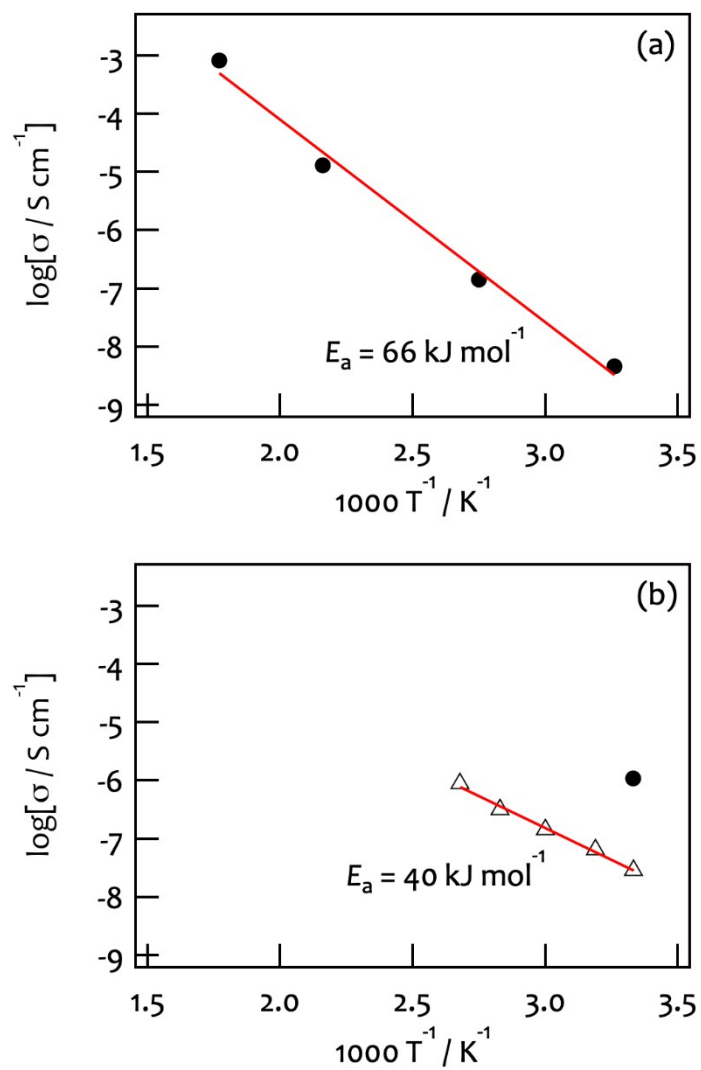

**Figure S5.** Arrhenius plots of ionic conductivities for the discovered phases (a)  $\text{Li}_6\text{Ge}_2\text{P}_4\text{O}_{17}$  and (b)  $\text{Li}_3\text{Zn}_{0.65}\text{Ge}_{4.35}\text{O}_{10.85}$ . Filled circles (●) and triangles (Δ) indicate the values for the sintered pellets at the synthetic temperature and cold-pressed pellet, respectively.

**Table S7.** Relative density of pellets used for impedance measurements.

| Sample                                                                       | Relative density ( $\text{g cm}^{-3}$ ) |
|------------------------------------------------------------------------------|-----------------------------------------|
| $\text{Li}_6\text{Ge}_2\text{P}_4\text{O}_{17}$ (sintered)                   | 2.31                                    |
| $\text{Li}_3\text{Zn}_{0.65}\text{Ge}_{4.35}\text{O}_{10.85}$ (cold pressed) | 2.62                                    |
| $\text{Li}_3\text{Zn}_{0.65}\text{Ge}_{4.35}\text{O}_{10.85}$ (sintered)     | 3.08                                    |

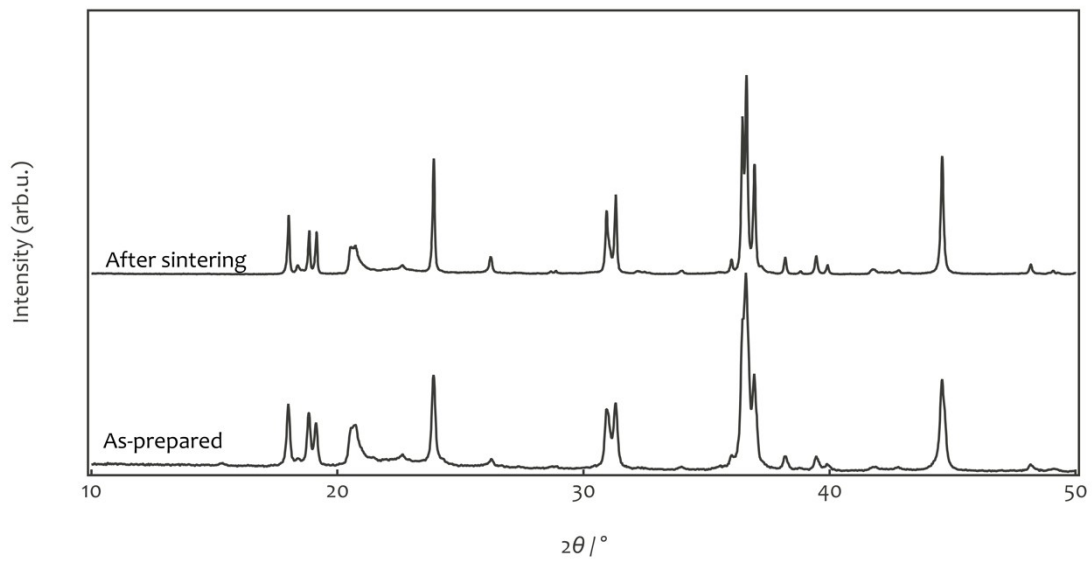

**Figure S6.** XRD patterns from  $\text{Li}_3\text{Zn}_{0.65}\text{Ge}_{4.35}\text{O}_{10.85}$  used for the impedance measurements, in the as-prepared state and after sintering. The latter sample shows sharper diffraction peaks, indicating the enhancement in the crystallinity of  $\text{Li}_3\text{Zn}_{0.65}\text{Ge}_{4.35}\text{O}_{10.85}$ .
